# Supplementary material for: Kinetics of the electrochemically-assisted deposition of sol–gel films
Source: Royal Society of Chemistry journal article supplement (doi:10.1039/c7cp01775h), 2017-01-01
Supplement: c7cp01775h2.pdf [file c7cp01775h2.pdf]

## Kinetics of the electrochemically-assisted deposition of sol-gel films

Liang Liu\*, Alain Walcarius

*Laboratoire de Chimie Physique et Microbiologie pour l'Environnement, UMR 7564, CNRS-Université de Lorraine, 405 rue de Vandoeuvre, 54600 Villers-lès-Nancy, France*

\*Email: [liang.liu@univ-lorraine.fr](mailto:liang.liu@univ-lorraine.fr)

### Supporting Information

#### Description of the numerical simulation

By dividing the concerned length and time into small segments  $\Delta x$  and  $\Delta t$ , respectively, the film deposition process can be expressed in numerical form. At  $x = 0$ , the concentration of  $\text{OH}^-$  ions is affected by the flux of electrochemical generation and the diffusion:

$$C_{\text{OH}^-}(0, t + \Delta t) = C_{\text{OH}^-}(0, t) + \frac{\Delta t}{\Delta x^2} D_{\text{OH}^-}^{\text{sol}} (C_{\text{OH}^-}(\Delta x, t) - C_{\text{OH}^-}(0, t)) + \frac{I_F \Delta x}{n F A D_{\text{OH}^-}^{\text{sol}}} \quad (\text{for } t < t^F) \quad (\text{Eq. 1})$$

$$C_{\text{OH}^-}(0, t + \Delta t) = C_{\text{OH}^-}(0, t) + \frac{\Delta t}{\Delta x^2} D_{\text{OH}^-}^{\text{film}} (C_{\text{OH}^-}(\Delta x, t) - C_{\text{OH}^-}(0, t)) + \frac{I_F \Delta x}{n F A D_{\text{OH}^-}^{\text{sol}}} \quad (\text{for } t \geq t^F) \quad (\text{Eq. 2})$$

where  $D_{\text{OH}^-}^{\text{sol}}$  and  $D_{\text{OH}^-}^{\text{film}}$  represent the diffusion coefficients of  $\text{OH}^-$  ions in the solution and the film, respectively. For  $0 < x < l$ , the diffusion coefficients of  $\text{OH}^-$  and  $-\text{SiOH}$  in the film are concerned.

$$C_{\text{OH}^-}(x, t + \Delta t) = C_{\text{OH}^-}(x, t) + \frac{\Delta t}{\Delta x^2} D_{\text{OH}^-}^{\text{film}} (C_{\text{OH}^-}(x + \Delta x, t) - 2C_{\text{OH}^-}(x, t) + C_{\text{OH}^-}(x - \Delta x, t)) \quad (\text{Eq. 3})$$

$$\begin{aligned} C_{-\text{SiOH}}(x, t + \Delta t) &= C_{-\text{SiOH}}(x, t) + \frac{\Delta t}{\Delta x^2} D_{-\text{SiOH}}^{\text{film}} (C_{-\text{SiOH}}(x + \Delta x, t) - 2C_{-\text{SiOH}}(x, t) + C_{-\text{SiOH}}(x - \Delta x, t)) - \Delta t k_f' C_{\text{OH}^-}(x, t) \\ &C_{-\text{SiOH}}(x, t)^2 \end{aligned} \quad (\text{Eq. 4})$$

$D_{-\text{SiOH}}^{\text{film}}$  is the diffusion coefficient of  $-\text{SiOH}$  in the deposited film. For  $x = l$ , one has to consider the diffusion flux both in the film and in the solution:

$$C_{OH^-}(x, t + \Delta t) = C_{OH^-}(x, t) + \frac{\Delta t}{\Delta x^2} D_{OH^-}^{film} (C_{OH^-}(x - \Delta x, t) - C_{OH^-}(x, t)) + \frac{\Delta t}{\Delta x^2} D_{OH^-}^{sol} (C_{OH^-}(x + \Delta x, t) - C_{OH^-}(x, t)) \quad (Eq. 5)$$

$$C_{-SiOH}(x, t + \Delta t) = C_{-SiOH}(x, t) + \frac{\Delta t}{\Delta x^2} D_{-SiOH}^{film} (C_{-SiOH}(x - \Delta x, t) - C_{-SiOH}(x, t)) + \frac{\Delta t}{\Delta x^2} D_{-SiOH}^{sol} (C_{-SiOH}(x + \Delta x, t) - C_{-SiOH}(x, t)) - \Delta t k_f' C_{OH^-}(x, t) C_{-SiOH}(x, t)^2 \quad (Eq. 6)$$

$D_{-SiOH}^{sol}$  is the diffusion coefficient of  $-SiOH$  in the solution. For  $x > l$ , the diffusion coefficients in the solution are considered:

$$C_{OH^-}(x, t + \Delta t) = C_{OH^-}(x, t) + \frac{\Delta t}{\Delta x^2} D_{OH^-}^{sol} (C_{OH^-}(x + \Delta x, t) - 2C_{OH^-}(x, t) + C_{OH^-}(x - \Delta x, t)) \quad (Eq. 7)$$

$$C_{-SiOH}(x, t + \Delta t) = C_{-SiOH}(x, t) + \frac{\Delta t}{\Delta x^2} D_{-SiOH}^{sol} (C_{-SiOH}(x + \Delta x, t) - 2C_{-SiOH}(x, t) + C_{-SiOH}(x - \Delta x, t)) - \Delta t k_f' C_{OH^-}(x, t) C_{-SiOH}(x, t)^2 \quad (Eq. 8)$$

The initial and semi-infinite boundary conditions still apply:

$$C_{OH^-}(x, 0) = C_{OH^-}^* \quad (Eq. 9)$$

$$C_{OH^-}(\infty, t) = C_{OH^-}^* \quad (Eq. 10)$$

$$C_{-SiOH}(x, 0) = C_{-SiOH}^* \quad (Eq. 11)$$

$$C_{-SiOH}(\infty, t) = C_{-SiOH}^* \quad (Eq. 12)$$

The equations above constitute the basis for the numerical simulation, which was programmed by Fortran 95. The source code and the compiled program are attached. They are also available upon request to the authors.

## Nomenclature

| Symbol | SI unit | Physical meaning |
|--------|---------|------------------|
|--------|---------|------------------|

|               |   |                                                                 |
|---------------|---|-----------------------------------------------------------------|
| $x, \Delta x$ | m | length in the axis of film thickness, unit length in simulation |
| $t, \Delta t$ | s | time, unit time in simulation                                   |

(Other symbols can be found in the main text of the publication.)
